1 **Effect of *Lactobacillus reuteri* on intestinal microflora and immune parameters:**

2 **involvement of sex differences**

3 Jiayi He<sup>1</sup>, Lingyi Wu<sup>1</sup>, Zhen Wu<sup>1\*</sup>, Daodong Pan<sup>1,2†</sup>, Yuxing Guo<sup>2</sup>, Xiaoqun Zeng<sup>1</sup>,

4 Liwei Lian<sup>3</sup>

6 **Running title: Sex differences to the consumption of *L. reuteri***

7 <sup>1</sup> Key Laboratory of Animal Protein Deep Processing Technology of Zhejiang, Marine

8 Science School, Ningbo University, Ningbo, Zhejiang, P. R. China

9 <sup>2</sup> Department of Food Science and Nutrition, Ginling College, Nanjing Normal

10 University, Nanjing, P. R. China

11 <sup>3</sup> Ningbo Dairy Group, Ningbo, 315211, Zhejiang, P.R. China

12

13

14

15

16

17

---

\*Corresponding authors: Zhen Wu, Key Laboratory of Animal Protein Food Deep Processing

Technology of Zhejiang Province, Ningbo University. Tel. +86 13857472882; E-mail:

woodsens@163.com;

†Co-corresponding author: Daodong Pan, Key Laboratory of Animal Protein Food Deep Processing

Technology of Zhejiang Province, Ningbo University. Tel.: + 86- 574 - 87600737; fax: + 86 – (0)574 -

87608347. E-mail: daodongpan@163.com.

18 **Abstract**

19 Probiotic candidate *L. reuteri* was screened out for *in vivo* experiments based on a  
20 relatively higher gastrointestinal tolerance and moderate adhesiveness. As results  
21 shown in *in-vivo* experiments, a significantly higher level of IL-12 at low-dose group  
22 was found both in females and males. Higher levels of T-lymphocytes were also  
23 observed in females compared to control group, however, males displayed a reduction  
24 except for CD8-positive cells in ileum. In comparison to the control group, the  
25 relative abundance of phylotypes in the phylum *Bacteroidetes* (genus of *Bacteroides*,  
26 *Prevotella*) and *Firmicutes* (genus of *ClostridiumIV*) exhibited a reverse shift  
27 between sexes after *L. reuteri* intervened. Meanwhile, the relative abundance of  
28 several taxa (*Acetobacteroides*, *Lactobcaillus*, *bacillus*) also differed markedly in  
29 sexes at low-dose group, together with microbiota diversity, as indicated by Shannon  
30 index.

31

32 **Importance**

33 Sexual dimorphism has triggered researchers' attention. However, the relationship  
34 between immune parameters and gut microbiota caused by *Lactobacillus* at different  
35 dosage are not fully elucidated. In present research, the possible probiotic role of *L.*  
36 *reuteri* DMSZ 8533 on immunomodulation and effect on fecal microbiota  
37 composition were investigated. Our findings demonstrate the importance of *L. reuteri*  
38 DMSZ 8533 as a potential probiotic strain with an immunomodulatory effect, which  
39 also alters the microflora composition depending on the sex of the host.

40 **Keywords:** *Lactobacillus reuteri*; immunomodulatory; microbiota; sex-differences;

41 dose-dependent

42

43

44

45

46

47

48

49

50

51

52

53

54

55

56

57

58

59

60

61

## 62 **Introduction**

63 *Lactobacillus*, which are generally considered probiotic, are the resident microflora in  
64 the human gastrointestinal tract (GIT). They exhibit various health-promoting effects,  
65 including anti-cancer [1,2] and anti-oxidation [3] effects, while helping to maintain  
66 microflora balance [4] and assisting in immuno-regulation [5]. Many *Lactobacillus*  
67 species are considered safe (GRAS) [6] and food-grade. They are involved in the  
68 fermentation of food such as in dry-fermented sausage [7] and yoghurt [8] among  
69 others.

70 To exert beneficial effects on a host, *Lactobacillus* must survive in, and colonize,  
71 the human GIT. Therefore, a high tolerance to low pH and bile toxicity are  
72 indispensable for achieving any potential probiotic effects [9,10]. Some *Lactobacillus*  
73 have survived in an adequate dose after passing through the human GIT *in vitro*.  
74 However, some strains displayed poor survival [11,5]. Adhesion ability is a key  
75 criteria, which has mainly been evaluated by performing *in vitro* experiments  
76 [12,13,14,15]. The HT-29 and Caco-2 cell lines are widely accepted models for the  
77 evaluation of bacterial adherence due to the fact that their morphological and  
78 functional properties mimic those of mature enterocytes [16].

79 Oral treatment with *Lactobacillus* has been shown to enhance immune response at  
80 the systemic [17,18] and mucosal [19] levels. Interaction between *Lactobacillus* and  
81 the intestinal mucosal system exerts vital effects on gut-associated immunoglobulin  
82 secretion, and on CD4 and CD8 T-lymphocyte activation [20]. Furthermore,  
83 *Lactobacilli* stimulate CD4-positive cells [21], which can differentiate into T helper

84 type 1 or 2 (Th1/Th2) lymphocytes. Th1 cells mainly mediate cellular immunity  
85 associated with the cytokines Interferon- $\gamma$  and TNF- $\alpha$ , while Th2 cells drive the  
86 humoral immune response by secreting IL-4 and IL-5. However, the  
87 *Lactobacillus*-influenced immunomodulatory effect is strain-specific [22,23], and also  
88 is related to the concentration of *Lactobacillus* [24].

89 In addition to immune effects, the ingestion of “probiotic *Lactobacillus*” may  
90 modify and balance intestinal microflora by competing with pathogenic  
91 microorganisms [25] and by maintaining favorable microflora [26]. The Illumina  
92 MiSeq platform based on 16S rRNA gene amplicons has been used to investigate  
93 human gut microflora, including the composition of intestinal microflora before and  
94 after probiotic intake [27].

95 Recently, sexual dimorphism has triggered researchers’ interest. Studies have found  
96 sex-associated differences in relation to the immune system [28], gut community  
97 composition [29] and metabolic activity [30]. Sex differences in relation to immune  
98 parameters and gut microbiota caused by *Lactobacillus* have not yet been fully  
99 elucidated. The objective of this study is to evaluate and screen out a comparatively  
100 more tolerant and adhesive *Lactobacillus* strain among three *Lactobacillus*  
101 (*plantarum* 14917, *acidophilus* ATCC 4356 and *reuteri* DMSZ 8533) *in vivo*.  
102 Furthermore, sex differences in immunomodulatory effects and microflora  
103 composition were investigated in a BALB/c mice model.

104

## 105 **Results**

106 **Tolerance and adhesion-related property of *Lactobacillus* strains** As shown in  
107 Fig. 1A, *L. reuteri* exhibited a high tolerance to low pH and bile salts, retaining its  
108 viability with only a 1.8 log reduction. In comparison, the viable numbers for *L.*  
109 *plantarum* and *L. acidophilus* decreased dramatically (5.28 logs and 2.98 logs,  
110 respectively). Meanwhile, all tested *Lactobacillus* strains showed high aggregation  
111 values ranging from 20.40% to 26.03% (Fig. 1B). However, no significant difference  
112 ( $P > 0.05$ ) was found among tested strains. The percentage of cell surface  
113 hydrophobicity for *L. plantarum*, *L. acidophilus* and *L. reuteri* was significantly  
114 different ( $P > 0.05$ ), and *L. reuteri* was characterized by the highest affinity to xylene  
115 and a modest adhesion value (3.82%). However, *L. plantarum* and *L. acidophilus* both  
116 exhibited low cell surface hydrophobic values (less than 20%) and limited adhesive  
117 values (Fig. 1C and 1D).

118 **Organ mass and Cytokine Measurement in BALB/c mice** As Table 1 shows,  
119 treatment with a low dose of *L. reuteri* significantly decreased the spleen index  
120 compared with males in the high-dose group, although there was a slight increase  
121 observed in females. *L. reuteri* treatment (low- and high-dose groups) significantly  
122 decreased the thymus index compared with control group males, while there was no  
123 significant difference among females in the groups. Treatment with high doses of *L.*  
124 *reuteri* significantly decreased the liver index compared with males and females in the  
125 control group.

126 The IL-12 and TNF- $\alpha$  cytokine production profiles induced by different doses of *L.*  
127 *reuteri* are shown in Fig. 2. Considerable IL-12 secretion in the low-dose group was

128 detected, which was significantly higher ( $P < 0.05$ ) than in the other groups in both  
129 males and females (Fig. 2A). No statistical difference was found in terms of the  
130 release of TNF- $\alpha$  in females or males (Fig. 2B), although a downward trend was  
131 observed in males.

132 **Immunohistochemistry of ileum section** As Fig. 3A shows, for females, ingestion  
133 of low and high doses of *L. reuteri* led to 20.11% and 18.50% increases, respectively,  
134 in CD4-positive cells compared with the control group. In contrast, males experienced  
135 a 4.42% reduction in such cells after high-dose treatment with *L. reuteri* compared  
136 with the control group. Females showed an increase in CD3-positive cells compared  
137 with the control group, increasing 23.59% and 13.5% for the low- and high-dose  
138 groups, respectively, however, males displayed reductions of 11.25% (low-dose) and  
139 19.5% (high-dose group) compared with the control group (Fig. 3B). An example  
140 typical of these findings is shown in Fig. 4B for CD4-positive cells and in Fig. 4D for  
141 CD3-positive cells in the female group treated with low doses of *L. reuteri*. As Fig. 5A  
142 shows, CD-8 positive cells experienced an increase of 4% and 3%, 4.95% and 1.12%  
143 in females and males, respectively, after ingestion of low and high dose of *L. reuteri*.  
144 Furthermore, there was a statistically difference between sexes at high-dose group  
145 ( $P = 0.023$ ).

146 **Sex difference on microbial correlation among groups** Using Illumina Miseq  
147 platform, a total of 1648603 raw sequences were generated from DNA isolated from  
148 fecal samples, and 1551889 valid sequences were filtered out and obtained after  
149 chimeras (Table S1). For Alpha diversity analysis (Table S2), high-dose of *L. reuteri*

150 significantly reduced shannon index compared with low-dose group in males, together  
151 with an apparent difference between sex (Table S3). While no apparent difference  
152 found in females. Based on beta diversity analysis, UniFrac clustering analysis  
153 suggested that there were no obvious phylogenetic differences and similar community  
154 structure between the control and high-dose groups in females (Fig. 6A). However,  
155 the control group results clustered together more closely with males in the low-dose  
156 group (Fig. 6B).

157 **Sex difference on microflora richness at taxonomic level** Taxonomic assignment  
158 at the phylum level indicated that gut microbiota shared a similar structure in female  
159 and male subjects consisting of four major phyla: *Bacteroidetes*, *Firmicutes*,  
160 *Proteobacteria*, and *Actinobacteria*. As Table 2 shows, a constant decline in the  
161 abundance of *Actinobacteria* in females was also found in males, but there was a  
162 statistically significant sharp decrease in females in the high-dose group. Additionally,  
163 *L. reuteri* treatment increased content of phylotypes in the phylum *Bacteroidetes* but  
164 decreased *Firmutes*, and opposite observation found in males. At the genus level,  
165 relative abundance of *Bacteroides* and *Prevotella* increased in females after *L. reuteri*  
166 intervened, while a statistically significant decrease was observed in males. The  
167 relative abundance of *Clostridium IV* displayed a reduction in females, while a  
168 statistically increase in males. *Lactobacillus* abundance in females was greater than  
169 the corresponding groups of males, this appeared to be a concentration-dependent  
170 relationship. What' more, an apparent difference was found between sexes at  
171 low-dose group (Table S4). An Ascend trend was found in high-dose group of



172 females in relation to *Lactococcus* abundance while a decrease in males.

## 173 **Discussion**

174 Tolerance to the stressful conditions found in the GIT and adherence to epithelial cells  
175 are commonly believed to be key factors in identifying probiotics [31]. The pH in the  
176 human stomach is approximately 2.0 to 2.5 [32] and the bile content in the upper  
177 small intestine ranges from 0.3% to 0.5% [33,34], which can destroy *Lactobacillus*  
178 and the attendant potential probiotic characteristics. Adhesion is another essential  
179 criterion to select a potential probiotic strain, since it is related to the residence time of  
180 *Lactobacillus* and, possibly, temporal colonization [35]. In our study, *L. reuteri*  
181 displayed promising survival rate and adhesion ability values, which is consistent with  
182 another study [36]. Based on these results, we conducted *in vivo* experiments to  
183 evaluate the effect of this possibly probiotic *L. reuteri* strain on immune response and  
184 microflora diversity.

185 Recently, mucosal immunity mediated by *L. reuteri* has sparked increased interest  
186 among researchers [37,38]. T lymphocytes initiate their helper or cytotoxic roles  
187 when they are activated by antigens or pathogens. In our study, low and high doses of  
188 *L. reuteri* induced a considerable increase in the number of T lymphocytes in females,  
189 which agreed with previous observations [37]. In contrast with changes in females, a  
190 slight decline was obtained in CD4- and CD3-positive cells in males. We  
191 hypothesized that the difference was due to sex hormones, such as estrogen or  
192 17 $\beta$ -estradiol (E2), which are widely accepted as enhancers of CD4<sup>+</sup> T cell expansion  
193 [39,40]. In mice, there are at least three CD4<sup>+</sup> subsets: Th1, Th2 and Th0. Th1 mainly

194 mediate cellular immunity associated with the secretion of the cytokines IL-12, IFN- $\gamma$   
195 and TNF- $\alpha$ . IL-12, produced by cells as part of the innate defense system in response  
196 to bacteria, is primarily IFN- $\gamma$  [41]. Low doses of *L. reuteri* were the most significant  
197 inducer of IL-12 in males and females, confirming that *L. reuteri* possess potent  
198 immune-enhancing properties. Our findings were consistent with other findings [42].  
199 However, high doses of *L. reuteri* had no effect on IL-12 secretion compared with the  
200 control group, which also agreed with previous research [43] that *Lactobacillus* were  
201 active only at low-bacterial concentrations. This finding might be ascribed to low and  
202 high dose microbe-associated molecular patterns (MAMP) mediating different  
203 receptor conformations, or they may differentially distribute to subcellular locations,  
204 subsequently activating different downstream pathways [44]. We further investigated  
205 the level of TNF- $\alpha$ , a major pro-inflammatory cytokine that can mediate the  
206 inflammatory response at a systemic level [45]. Notably, concentrations of TNF- $\alpha$  in  
207 males was much higher than that found in females. The higher content of  
208 *Helicobacter* and *Escherichia* in males (Table 2) might support this finding, which  
209 can both up-regulate TNF- $\alpha$  [46]. Furthermore, the TNF- $\alpha$  concentration exhibited a  
210 downward trend as *L. reuteri* concentration increased in males, possibly due to  
211 suppression by *L. reuteri* through the conversion of histamine via PKA and ERK  
212 signaling [47].

213 The intestinal microflora constitute a commensal anaerobic and facultative  
214 microorganism, which seeks to inhibit pathogens, participates in anabolic pathways  
215 and maintains immune hemostasis [48]. Many genera belonging to *Bacteroidetes*,

216 such as *Barnesiella* and *Bacteroides*, could modulate the immune response by  
217 enhancing populations of marginal zone B cells, natural killer T cells [49] or capsular  
218 polysaccharide biosynthesis [50]. In the present study, *L. reuteri* treatment increased  
219 the abundance of phylum *Bacteroidetes* (primarily the genus of *Barnesiella*,  
220 *Bacteroides*) in females but not in males. Another dominant phylum, *Firmicutes*,  
221 mainly consisted of the *Clostridia* class and *Bacilli* class, which are capable of  
222 producing lactic acid and carbon dioxide [51]. In our study, we observed a reverse  
223 shift in the content of *Firmicutes* between sexes after *L. reuteri* treatment, which  
224 occurred largely relevant with the opposite variation of the phylum *Bacteroidetes*  
225 content. Additionally, the abundance of genus *Bacillus* and *Lactobacillus*, which both  
226 belonging to class *Bacilli*, also statistically different in the sexes, especially in the  
227 low-dose group (Table S4). However, *Lactobacillus* are generally considered  
228 immuno-mediators in the human GIT and can mediate mucosal immunity [37]. What'  
229 more, the antagonistic effect of *Lactobacillus* was also illustrated in our present study,  
230 with the abundance of *Lactobacillus* increased and the amount of harmful bacteria,  
231 such as *Enterococcus*, *Helicobacter* and *Escherichia* suppressed, consistent with Xie  
232 et al's findings [52]. The antagonistic actions of *Lactobacilli* might be the result of a  
233 pH reduction [53], bacteriocin secretion [54] and/or competition for adhesion sites  
234 with harmful bacteria. *Clostridial spp.*, such as *Clostridium IV*, which populates the  
235 ileum and cecum in mice, can produce short-chain fatty acids and induce Treg cells  
236 [55]. Positive correlations between the abundance of *Clostridium IV* and the  
237 concentration of *L. reuteri* were found in males while a reduction phenomenon in

238 females. However, the abundance of *Clostridium IV* in females was greater than that  
239 in males in the corresponding dose groups.

## 240 **Conclusion**

241 As the most resistant probiotic strain found in our *in vitro* experiments, *L. reuteri*  
242 DMSZ 8533's effect on the immune parameters of, and microbial composition in,  
243 BALB/c mice were affected by sex differences. Our results demonstrated that *L.*  
244 *reuteri* exerted a positive effect on the immune response in females, with higher levels  
245 of T lymphocytes and IL-12 observed at low doses of *L. reuteri*. However, males did  
246 not exhibit the same response, except in relation to IL-12 and CD-8 T cells. In  
247 addition, *L. reuteri* treatment exhibited a reserve shift between sexes on the content  
248 of phylotypes in the phylum *Bacteroidetes* (genus of *Bacteroides* and *Prevotella*) and  
249 *Firmicutes* (genus of *ClostridiumIV*).

250

## 251 **Materials and Methods**

252 *Lactobacillus reuteri* DMSZ 8533 was purchased from the China Center of Industrial  
253 Culture Collection (Beijing, China). *Lactobacillus plantarum* 14917 was preserved in  
254 our laboratory, while *Lactobacillus acidophilus* ATCC 4356 was obtained from the  
255 China General Microbiological Culture Collection Center (Beijing, China). Bacteria  
256 were incubated anaerobically in MRS broth at 37 °C for 24 h before use. Bacteria  
257 were stored at -80 in 30% (v/v) glycerol.

258 Caco-2 cells obtained from the Biological Technology Co. (California, USA), which  
259 isolated from human adenocarcinoma of colon, were grown in DMEM (Sigma,

260 Darmstadt, Germany) containing 20% (v/v) fetal bovine serum (FBS) and 1% (v/v)  
261 antibiotics (100 U/mL penicillin, 100 mg/mL streptomycin) at 37 °C in a 5% CO<sub>2</sub>  
262 atmosphere. For the adhesion assay, 2 mL of cells were seeded in a 6-well tissue  
263 culture plate without antibiotics and cultivated until 90% confluence was achieved.

#### 264 **Gastrointestinal tolerance analysis**

265 Simulated gastric digestion was performed as described previously [56] with slight  
266 modifications. Overnight cultures (4 mL) were harvested by centrifugation at 6000×g  
267 for 10 min and suspended in 4 mL artificial gastric juice adjusted to pH 2.0 with 1  
268 mol/L hydrochloric acid. The bacterial suspension was incubated for 3 h at 37 °C. The  
269 aliquots were taken for the enumeration of viable cells at 0 and 180 min. After  
270 treatment with artificial gastric juice, bacteria were collected by centrifugation  
271 (6000×g, 10 min) and suspended in simulated intestinal fluids adjusted to pH 8.0 with  
272 1 mol/L NaOH for another 4 h. The colony forming unit (CFU) enumeration was  
273 determined at 0 and 4 h.

#### 274 **Auto-aggregation analysis**

275 Auto-aggregation assay was assessed according to the method described by Xu et al  
276 [57]. Briefly, 5 mL bacteria cells in the stationary phase were centrifuged, washed  
277 twice with 0.01 M phosphate buffered solution (PBS) and re-suspended in PBS to  
278 OD<sub>600</sub>=0.5±0.02 (A<sub>0</sub>). Then 3 mL bacterial suspension was vortexed for 15 s and  
279 incubated at room temperature for 3 h. Then 0.4 mL of the upper suspension was  
280 removed to determine the absorbance (A<sub>1</sub>) at 600 nm. The auto-aggregation  
281 percentage was expressed as:

282 Auto-aggregation rate (%) =  $(1-A_1/A_0) \times 100$

### 283 **Cell-surface hydrophobicity analysis**

284 Microbial adhesion to solvents (MATS) was used to evaluate the surface  
285 hydrophobicity property of the *Lactobacillus* with slight modifications [58,59].  
286 Bacteria in the stationary phase were harvested, washed twice with PBS, and  
287 re-suspended in 0.1 M  $\text{KNO}_3$  to  $10^8$  CFU/mL ( $A_0$ ). Then 1.2 mL of bacteria  
288 suspension was mixed with 0.2 mL xylene and vortexed for 2 min after achieving a  
289 stationary condition for 10 min. To ensure the complete separation of the mixture, the  
290 aqueous phase was removed after 30 min of incubation at room temperature and its  
291 absorbance ( $A_1$ ) was measured at  $\text{OD}_{600}$ . The percentage of microbial adhesion to  
292 solvents was calculated as:

293 Cell surface hydrophobicity (%) =  $(1-A_1/A_0) \times 100$ .

### 294 **Adhesion analysis**

295 Bacteria in the stationary phase were centrifuged ( $6000 \times g$ , 10 min), washed twice and  
296 re-suspended in PBS adjusted to  $\text{OD}_{600}=0.7 \pm 0.05$ . Then they were mixed with 10  $\mu\text{M}$   
297 6-carboxyfluorescein diacetate (CFDA; Sigma, Darmstadt, Germany) and incubated  
298 at 37 °C for 30 min. Bacteria were washed three times to remove any unmarked  
299 CFDA. Caco-2-coated wells were washed twice with PBS, and 2 mL of  
300 CFDA-labelled bacteria were added. The mixture was incubated in a 5%  $\text{CO}_2$   
301 atmosphere at 37 °C for 2 h. After incubation, the wells were washed three times with  
302 2 mL PBS to remove the un-adhered bacteria, and then 1.4 mL 0.25% EDTA-trypsin  
303 was added into the wells for 10 min. Then 0.6 mL DMEM was added to terminate

304 digestion. Finally, fluorescence intensity (excitation wavelength 485 nm; emission  
305 wavelength 538 nm) was measured using a Tecan Infinite M200 Pro (Tecan Group,  
306 Switzerland) and the adhesion rate was expressed as the percentage of fluorescence  
307 recovered after binding to Caco-2 cells relative to the fluorescence of the bacterial  
308 suspension added to the wells.

### 309 **Animals and treatment**

310 BALB/c mice (6 weeks old) purchased from the Zhejiang Academy of Medical  
311 Sciences (Hangzhou, China) were housed in an automatic light/dark cycle (light  
312 periods of 12 h) habitat, and provided water and rodent chow during the whole  
313 experiment under specific pathogen-free (SPF) conditions (Laboratory Animal Center  
314 of Ningbo University). Mice were randomly divided into three groups (n=12/group, 6  
315 each sex): control and low- and high-dose groups. For low- and high-dose groups,  
316 mice received 0.4 mL of skimmed milk containing  $10^8$  CFU/mL or  $10^{10}$  CFU/mL *L.*  
317 *reuteri* DMSZ 8533, respectively, by oral gavage every day for four weeks. Mice in  
318 the control group were administrated 0.4 mL of skimmed milk containing no *L.*  
319 *reuteri*. All animal care and experimental procedures were approved by the  
320 Committee on Animal Care and Use, and the Committee on the Ethics of Animal  
321 Experiments of Ningbo University. Before surgery, mice were weighed and injected  
322 with 5 mg/kg Carprophen (Rimadyl) as an analgesic. Then mice were anesthetized  
323 (isoflurane 2–3% mixed with 30% oxygen (O<sub>2</sub>) and 70% nitrous oxide (N<sub>2</sub>O) before  
324 eyeball extirpating. Then the spleen, thymus and liver were weighed.

### 325 **Enzyme-linked immunosorbent assay**

326 Blood drawn from the eyes was collected, kept at room temperature for 1.5 h and  
327 centrifuged (2500×g, 30 min). The obtained serum was frozen (-80 °C) for IL-12 and  
328 TNF-α determination using a mouse IL-12/TNF-α Elisa Kit (Lianke-Biotech Co.,  
329 Hangzhou, China).

### 330 **Immunohistochemistry**

331 For immunohistochemistry, the method was performed according to previous research  
332 [60]. Briefly, ileum sections were fixed in 4% paraformaldehyde (Sigma-Aldrich,  
333 USA) and embedded in paraffin. Sections were baked at 60 °C overnight,  
334 de-paraffinized in xylene and hydrated in graded ethanol. Antigen retrieval was  
335 performed in citrate antigen retrieval solution to maintain pressure for 4 min and  
336 cooled to room temperature. Drops of 3% H<sub>2</sub>O<sub>2</sub> were added to quench any  
337 endogenous peroxide activity. Tissue sections were blocked with blocking buffer  
338 (Sangon-Biotech, Shanghai, China) for 45 min, rinsed and incubated with properly  
339 diluted primary antibody (anti-CD4 or anti-CD8 antibody, Abcam; anti-CD3 antibody,  
340 Cell Signaling Technology) overnight. Goat anti-rabbit secondary antibody was then  
341 used to detect anti-CD4, anti-CD3 or anti-CD8. Streptavidin-HRP and  
342 Diaminobenzidine (DAB) were used to visualize regions of tissue with anti-CD4,  
343 anti-CD3 or anti-CD8. Hematoxylin was used to counter-stain cells. The CD-8, CD4-  
344 and CD3-positive cells were counted in three fields using an Olympus BX53  
345 (Pennsylvania, USA) microscope at 400 ×magnification.

### 346 **16S rRNA amplification and MiSeq sequencing**



347 The V3-V4 variable region of the 16S rRNA gene was amplified from 35 fecal DNA  
348 extracts using the 16S meta-genomic sequencing library protocol (Illumina). Two  
349 rounds of PCR amplification were completed on the fecal DNA. The initial step was  
350 performed with the PCR primers targeting the V3-V4 region of the 16sRNA gene:  
351 341F and 805R (Forward primer:  
352 CCCTACACGACGCTCTTCCGATCTGCCTACGGGNGGCWGCAG; Reverse  
353 primer: GACTGGAGTTCCTTGGCACCCGAGAATTCCA). All PCR reactions  
354 were performed with Ex Taq polymerase (Takara, Shanghai, China) with  
355 approximately 10-20 ng of genomic DNA as follows: heated lid at 94° C for 3 min;  
356 followed by 5 cycles of amplification at 94 °C (30 s), 45 °C (20 s) and 60 °C (30 s); 20  
357 cycles of amplification at 94 °C(20 s), 55 °C(20 s) and 72 °C(30 s); and a final  
358 extension step of 5 min at 72 °C. Successful amplicons were purified with an  
359 Easypure quick gel extraction kit (Transgen Biotech; Beijing, China). A second round  
360 of amplification was performed with 20 ng of purified DNA and primers containing  
361 the Illumina adapters and indexes. PCR cycling conditions were as follows: 95 °C for  
362 3 min; 5 cycles at 94 °C for 20 s, 72 °C 30 s, 72 °C 30 s; and a final extension step at  
363 72 °Cfor 5 min. All purified DNA amplicons were pooled in equimolar concentrations  
364 and the final concentration was adjusted to 20 pmol for subsequent metagenomic  
365 sequencing.

### 366 **Bioinformatics and statistical analysis**

367 Data were analyzed using a one-way analysis of variance (ANOVA) and  
368 independent-samples test using 16.0 SPSS software (SPSS Inc., USA) with P values  
369 of 0.05 considered significant.

370 For gut microbiota analysis, raw sequences were trimmed to remove sequence of  
371 primer joint, and high-quality pair-end reads were merged on tags through overlaps  
372 using Pear (v 0.9.6) software. The valid data were obtained through distinguished by  
373 unique barcode sequences, filtered by quality control and remained after chimeras.  
374 The tag were clustered to operational taxonomic units (OTUs) using Ultra-fast  
375 sequence analysis (Usearch version 5.2.236) with 97 % identity level. Relative  
376 abundance of bacterial taxa were determined for each community by comparing the  
377 number of reads assigned to a specific taxa to total number of reads. Alpha diversity  
378 used to analyze the species diversity and richness was calculated by Mothur (version  
379 1.30.1) software. Bray-Crutis trees based on genus level was carried out by  
380 Unweighted Pair Group Method with Arithmetic mean (UPGMA) and was done with  
381 software programme R(version 3.2). UniFrac, including weighted UniFrac and  
382 unweighted UniFrac, used the systematic evolution information to compare the  
383 composition of the microbial community between samples.

384

### 385 **Acknowledgement**

386 This work was supported by the Natural Science Funding of China (31601487,  
387 31671869 and 31471598), the Science and Technology Bureau of Ningbo  
388 (2016C10022), and the K. C. Wong Magna Fund in Ningbo University.

389

390 **Conflict of Interest**

391 The authors have declared no conflict of interest.

392 **References**

- 393 [1] Nami, Y., Abdullah, N., Haghshenas, B., Radiah, D., Rosli, R., Khosroushahi, A.  
394 Y., 2014. Assessment of probiotic potential and anticanceractivity of newly isolated  
395 vaginal bacterium *Lactobacillus plantarum*5BL. *Microbiol Immunol.* 58: 492-502.
- 396 [2] Nandhini, B., M. Palaniswamy., 2013. Anticancer effect of goat milk fermented by  
397 *Lactobacillus plantarum* and *Lactobacillus paracasei*. *Int J Pharm Pharm Sci.* 5:  
398 898-901.
- 399 [3] Lin, M.Y., Chang, F.j., 2000. Antioxidative Effect of Intestinal Bacteria  
400 *Bifidobacterium longum* ATCC 15708 and *Lactobacillus acidophilus* ATCC 4356.  
401 *Digest Dis Sci.* 45:1617-1622.
- 402 [4] Orrhage, K., Nord, C.E., 2000. Bifidobacteria and lactobacillus in human health.  
403 *Drugs Exp Clin Res.* 26: 95-111.
- 404 [5] Kou, X., Chen, Q., Ju, X., Liu, H. et al.,2014. A tolerant lactic acid bacteria,  
405 *Lactobacillus paracasei*, and its immunoregulatory function. *Can J Microbiol.* , 60:  
406 729-736.
- 407 [6] Marteau, P., Rambaud, J. C., 1993. Potential of using lactic acid bacteria for  
408 therapy and immunomodulation in man. *Fems MicrobiolRev.* 12: 207-220.

- 409 [7] Ruiz, S., 2011. Application of *Lactobacillus fermentum* HL57 and *Pediococcus*  
410 *acidilactici* SP979 as potential probiotics in the manufacture of traditional Iberian  
411 dry-fermented sausages. *Food Microbiol.* 28: 839-847
- 412 [8] Jankovic, I., Sybesma, W., Phothirath, P., Ananta, E., Mercenier, A., 2010.  
413 Application of probiotics in food products-challenges and new approaches. *Curr Opin*  
414 *Biotech.* 21: 175-181.
- 415 [9] Pan, X., Chen, F., Wu, T., Tang, H., Zhao, Z., 2009. the acid, bile tolerance and  
416 antimicrobial property of *lactobacillus acidophilus* NIT. *Food Control.* 20: 598-602.
- 417 [10] Vinderola, C. G., Reinheimer, J. A., 2003. Lactic acid starter and probiotic  
418 bacteria: a comparative "in vitro" study of probiotic characteristics and biological  
419 barrier resistance. *Food Res Int.* 36: 895-904.
- 420 [11] Klingberg, T. D., Budde, B. B., 2006. The survival and persistence in the human  
421 gastrointestinal tract of five potential probiotic lactobacilli consumed as freeze-dried  
422 cultures or as probiotic sausage. *Int J Food Microbiol.* 109: 157-159.
- 423 [12] Izquierdo, E., Medina, M., Ennahar, S., Marchioni, E., Sanz, Y., 2008. Resistance  
424 to simulated gastrointestinal conditions and adhesion to mucus as probiotic criteria for  
425 *Bifidobacterium longum* strains. *Curr Microbiol.* 56: 613-618.
- 426 [13] Jakavaviljanen, M., Palva, A., 2007. Isolation of surface (S) layer protein  
427 carrying *Lactobacillus* species from porcine intestine and faeces and characterization  
428 of their adhesion properties to different host tissues. *Vet Microbiol.* 124: 264-273.

- 429 [14] Lenaerts, K., Bouwman, F. G., Lamers, W. H., Renes, J., Mariman, E. C., 2007.  
430 Comparative proteomic analysis of cell lines and scrapings of the human intestinal  
431 epithelium. *Bmc Genomics*. 8: 1-14.
- 432 [15] Pă Rez, P. F., Minnaard, Y., Disalvo, E. A., De Antoni, G. L., 1998. Surface  
433 properties of bifidobacterial strains of human origin. *Appl Environ Microbiol*. 64:  
434 21-26.
- 435 [16] Pinto, M., 1983. Enterocyte-like differentiation and polarization of the human  
436 colon carcinoma cell line Caco-2 in culture. *Biol Cell*. 47: 323-330.
- 437 [17] Perdigon, G., de Macias, M. E., Alvarez, S., Oliver, G., Aa, D. R. H., 1986.  
438 Effect of perorally administered lactobacilli on macrophage activation in mice. *Infect*  
439 *Immun*. 53: 404-410.
- 440 [18] Perdigón, G., de Macias, M. E., Alvarez, S., Oliver, G., Ap, D. R. H., 1988.  
441 Systemic augmentation of the immune response in mice by feeding fermented milks  
442 with *Lactobacillus casei* and *Lactobacillus acidophilus*. *Immunology*. 63: 17-23.
- 443 [19] Vinderola, G., C. Matar., G. Perdigon., 2005. Role of intestinal epithelial cells in  
444 immune effects mediated by gram-positive probiotic bacteria: involvement of toll-like  
445 receptors. *Clin Diagn Lab Immunol*. 12: 1075-1084.
- 446 [20] Perdigón, G., R. Fuller., R. Raya., 2001. Lactic acid bacteria and their effect on  
447 the immune system. *Curr Issues Intest Microbiol*. 2: 27-42.
- 448 [21] Baken, K. A., Ezendam, J., Gremmer, E. R., De, K. A., Pennings, J. L., Matthee,  
449 B., Peijnenburg, Ad. A., Loveren, H. V., 2006. Evaluation of immunomodulation by

- 450 *Lactobacillus casei* Shirota: immune function, autoimmunity and gene expression. *Int*  
451 *J Food Microbiol.* 112: 8-18.
- 452 [22] Gill, H. S., Rutherford, K. J., Prasad, J., Gopal, P. K., 2000. Enhancement of  
453 natural and acquired immunity by *Lactobacillus rhamnosus* (HN001), *Lactobacillus*  
454 *acidophilus* (HN017) and *Bifidobacterium lactis* (HN019). *Br J Nutr.* 83: 167-176.
- 455 [23] Spanhaak, S., R. Havenaar., G. Schaafsma., 1998The effect of consumption of  
456 milk fermented by *Lactobacillus casei* strain Shirota on the intestinal microflora and  
457 immune parameters in humans. *Eur J Clin Nutr.* 52: 899-907
- 458 [24] Gill, H.S, Rutherford, K.J., 2001. Viability and dose-response studies on the  
459 effects of the immunoenhancing lactic acid bacterium *Lactobacillus rhamnosus* in  
460 mice. *Br J Nutr.* 86: 285-289.
- 461 [25] Lee, Y.K., Puong, K.Y., 2002. Competition for adhesion between probiotics and  
462 human gastrointestinal pathogens in the presence of carbohydrate. *Br J Nutr.* 88:  
463 S101-S108.
- 464 [26] Holzapfel, W. H., Haberer, P., Snel, J., Schillinger, U., Jh, H. I. V., 1998.  
465 Overview of gut flora and probiotics. *Int J Food Microbiol.* 41: 85-101.
- 466 [27] Zoetendal, E.G., M. Rajilicstojanovic., W.M. de Vos., 2008. High-throughput  
467 diversity and functionality analysis of the gastrointestinal tract microbiota. *Gut.* 57:  
468 1605-1615.
- 469 [28] Angele, M. K., Schwacha, M. G., Ayala, A., Chaudry, I. H., 2000. Effect of  
470 gender and sex hormones on immune responses following shock. *Shock.* 14: 81-89.

- 471 [29] Bernbom, N., Nørrung, B., Saadbye, P., Mølbak, L., Vogensen, F. K., Licht, T. R.,  
472 2006. Comparison of methods and animal models commonly used for investigation of  
473 fecal microbiota: effects of time, host and gender. *J Microbiol Methods*. 66: 87-95.
- 474 [30] Mcorist, A. L., Miller, R. B., Bird, A. R., Keogh, J. B., Noakes, M., Topping, D.  
475 L., Conlon, M. A., 2011. Fecal butyrate levels vary widely among individuals but are  
476 usually increased by a diet high in resistant starch. *J Nur*. 141: 883-889.
- 477 [31] Collins, J.K., G. Thornton., G.O. Sullivan., 1998. Selection of Probiotic Strains  
478 for Human Applications. *Int Dairy J*. 8: 487-490.
- 479 [32] Fernández, M.F., S. Boris., C. Barbés., 2003. Probiotic properties of human  
480 *lactobacilli* strains to be used in the gastrointestinal tract. *J Appl Microbiol*. 94:  
481 449-455.
- 482 [33] Dunne, C., Murphy, L., Flynn, S., Omahony, L., Ohalloran, S., Feeney, M., 1999.  
483 Probiotics: from myth to reality. Demonstration of functionality in animal models of  
484 disease and in human clinical trials. *Antonie Van Leeuwenhoek*. 76: 279-292.
- 485 [34] Gómez, Z. A., Kociubinski, G., Pérez, P., De, A. G., 1998. Isolation and  
486 characterization of *Bifidobacterium* strains for probiotic formulation. *J Food Prot*. 61:  
487 865-873.
- 488 [35] Servin, A. L., Coconnier, M. H., 2003. Adhesion of probiotic strains to the  
489 intestinal mucosa and interaction with pathogens. *Best Pract Res Clin Gastroenterol*.  
490 17: 741-754.

- 491 [36] Jensen, H., Grimmer, S., Naterstad, K., Axelsson, L., 2012. In vitro testing of  
492 commercial and potential probiotic lactic acid bacteria. *Int J Food Microbiol.* 153:  
493 216-222.
- 494 [37] Valeur, N., Engel, P., Carbajal, N., Connolly, E., Ladefoged, K., 2004.  
495 Colonization and Immunomodulation by *Lactobacillus reuteri* ATCC 55730 in the  
496 Human Gastrointestinal Tract. *Appl Environ Microbiol.* 70: 1176-1181.
- 497 [38] Wang, B., Li, J. S., Li, Q. R., Zhang, H. Y., Ning, L., 2009. Isolation of adhesive  
498 strains and evaluation of the colonization and immune response by *Lactobacillus*  
499 *plantarum* L2 in the rat gastrointestinal tract. *Int J Food Microbiol.* 132: 59-66.
- 500 [39] Lang, T.J., 2004. Estrogen as an immunomodulator. *Clin Immunol.* 113: 224-230.
- 501 [40] Maret, A., Coudert, J. D., Garidou, L., Foucras, G., Gourdy, P., & Krust, A., 2003.  
502 Estradiol enhances primary antigen-specific CD4 T cell responses and Th1  
503 development *in vivo*. Essential role of estrogen receptor  $\alpha$  expression in hematopoietic  
504 cells. *Eur J Immunol.* 33: 512-551.
- 505 [41] Trinchieri, G., 1994. Interleukin-12: a cytokine produced by antigen-presenting  
506 cells with immunoregulatory functions in the generation of T-helper cells type 1 and  
507 cytotoxic lymphocytes. *Blood.* 84: 4008-4027.
- 508 [42] Azevedo, M. S. P., Zhang, W., Wen, K., Gonzalez, A. M., Saif, L. J., Yousef, A.  
509 E., Yuan, L., 2012. *Lactobacillus acidophilus* and *Lactobacillus reuteri* modulate  
510 cytokine responses in gnotobiotic pigs infected with human rotavirus. *Benef Microbes.*  
511 3: 33-42.



- 512 [43] Hesse, C., L.A. Hanson., A.E. Wold., 1999. *Lactobacilli* from human  
513 gastrointestinal mucosa are strong stimulators of IL-12 production. Clin Exp Immunol.  
514 116:276-282.
- 515 [44] Wen, K., Li, G., Bui, T., Liu, F., Li, Y., Kocher, J., Lin, L., Yang, X., Yuan, L.,  
516 2012. High dose and low dose *Lactobacillus acidophilus* exerted differential immune  
517 modulating effects on T cell immune responses induced by an oral human rotavirus  
518 vaccine in gnotobiotic pigs. Vaccine. 30: 1198-1207.
- 519 [45] Singh, I. S., He, J. R., Hester, L., Fenton, M. J., Hasday, J. D., 2004. Bacterial  
520 endotoxin modifies heat shock factor-1 activity in RAW 264.7 cells: implications for  
521 TNF-alpha regulation during exposure to febrile range temperatures. J Endotoxin Res.  
522 10: 175-184.
- 523 [46] Fu, Y., Zhou, E., Liu, Z., Li, F., Liang, D., Liu, B., Song, X., Zhao, F., Fen, X., Li,  
524 D., Cao, Y., Zhang, X., Zhang, N., Yang, Z., 2013. *Staphylococcus aureus* and  
525 *Escherichia coli* elicit different innate immune responses from bovine mammary  
526 epithelial cells. Vet Immunol Immunopathol. 155: 245-252.
- 527 [47] Thomas, C. M., Hong, T., Pijkeren, J. P. V., Hemarajata, P., Trinh, D. V., Hu, W.  
528 D., Britton, R. A., Kalkum, M., Versalovic, J., 2012. Histamine Derived from  
529 Probiotic *Lactobacillus reuteri* Suppresses TNF via Modulation of PKA and ERK  
530 Signaling. Plos One. 7, e31951.
- 531 [48] Macpherson, A. J., Harris, N. L., 2004. Interactions between commensal  
532 intestinal bacteria and the immune system. Nat Rev Immunol. 4: 478-485.

- 533 [49] Presley, L. L., Bo Wei., Jonathan Braun., Borneman, J., 2010. Bacteria associated  
534 with immunoregulatory cells in mice. *Appl Environ Microbiol.* 76: 936-941.
- 535 [50] Duerkop, B.A., S. Vaishnava., L.V. Hooper., 2009. Immune Responses to the  
536 Microbiota at the Intestinal Mucosal Surface. *Immunity.* 31: 368-376.
- 537 [51] Hold, G. L., Pryde, S. E., Russell, V. J., Furrie, E., Flint, H. J., 2002. Assessment  
538 of microbial diversity in human colonic samples by 16S rDNA sequence analysis.  
539 *FEMS Microbiol Ecol.* 39: 33-39.
- 540 [52] Ning, X., Yi, C., Yin, Y. N., Xin, Z., Yang, J. W., Wang, Z. G., Nian, F., Yong, T.,  
541 Wang, X. H., Liu, X. W., Wang, C. L., Lu, F. G., 2011. Effects of two *Lactobacillus*  
542 strains on lipid metabolism and intestinal microflora in rats fed a high-cholesterol diet.  
543 *BMC Complement Altern Med.* 11: 53.
- 544 [53] Naaber, P., Smidt, I., Stepetova, J., Brilene, T., Annuk, H., Mikelsaar, M., 2004.  
545 Inhibition of *Clostridium difficile* strains by intestinal *Lactobacillus* species. *J Med*  
546 *Microbiol.* 53: 551-554.
- 547 [54] Millette, M., F.M. Luquet., M. Lacroix., 2007. In vitro growth control of selected  
548 pathogens by *Lactobacillus acidophilus* and *Lactobacillus casei*-fermented milk. *Lett*  
549 *Appl Microbiol.* 44, 314-319.
- 550 [55] Atarashi, K., Tanoue, T., Oshima, K., Suda, W., Nagano, Y., Nishikawa, H.,  
551 Fukuda S., Saito T., Narushima S., Hase K., Kim S., Fritz JV., Wilmes P., Ueha S.,  
552 Matsushima K., Ohno H., Olle B., Sakaguchi S., Taniguchi T., Morita H., Hattori M.,  
553 Honda K., 2013. Treg induction by a rationally selected mixture of *Clostridia* strains  
554 from the human microbiota. *Nature.* 500: 232-236.

555 [56] Veen, H. V. B. D., Lee, I., Marco, M. L., Wels, M., Bron, P. A., Kleerebezem, M.,  
556 2012. Modulation of *Lactobacillus plantarum* Gastrointestinal Robustness by  
557 Fermentation Conditions Enables Identification of Bacterial Robustness Markers. Plos  
558 One. 7, e39053.

559 [57] Xu, H., Jeong, H. S., Lee, H. Y., Ahn, J., 2009. Assessment of cell surface  
560 properties and adhesion potential of selected probiotic strains. Lett Appl Microbiol. 49:  
561 434–442.

562 [58] Pelletier, C., Bouley, C., Cayuela, C., Bouttier, S., Bourlioux, P., Bellon-Fontaine,  
563 M. N., 1997. Cell surface characteristics of *Lactobacillus casei subsp. casei*,  
564 *Lactobacillus paracasei subsp. paracasei*, and *Lactobacillus rhamnosus* strains. Appl  
565 Environ Microbiol. 63: 1725-1731.

566 [59] Samot, J., J. Lebreton., C. Badet., 2011. Adherence capacities of oral *lactobacilli*  
567 for potential probiotic purposes. Anaerobe. 17: 69-72.

568 [60] Liu, Y., Fatheree, N. Y., Dingle, B. M., Tran, D. Q., Rhoads, J. M., 2013  
569 *Lactobacillus reuteri* DSM 17938 Changes the Frequency of Foxp3+ Regulatory T  
570 Cells in the Intestine and Mesenteric Lymph Node in Experimental Necrotizing  
571 Enterocolitis. Plos One. 8, e56547.

572

573

574

575

576

577

578

579

580

581 **Tables**

582

583

**Table 1.** Effect of *L. reuteri* DMSZ 8533 on immune organ index

| group     | spleen index (%) |                           | thymus index (%) |                          | liver index (%)          |                           |
|-----------|------------------|---------------------------|------------------|--------------------------|--------------------------|---------------------------|
|           | female           | male                      | female           | male                     | female                   | male                      |
| control   | 0.480±0.033      | 0.369±0.018 <sup>ab</sup> | 0.261±0.059      | 0.166±0.024 <sup>a</sup> | 4.890±0.148 <sup>a</sup> | 4.954±0.334 <sup>a</sup>  |
| low dose  | 0.482±0.013      | 0.336±0.021 <sup>b</sup>  | 0.267±0.031      | 0.120±0.012 <sup>b</sup> | 4.874±0.158 <sup>a</sup> | 4.669±0.241 <sup>ab</sup> |
| high dose | 0.487±0.024      | 0.371±0.032 <sup>a</sup>  | 0.219±0.057      | 0.134±0.026 <sup>b</sup> | 4.646±0.177 <sup>b</sup> | 4.472±0.170 <sup>b</sup>  |

584 A) Values in a column with different superscript letters mean the index differ significantly ( $P < 0.05$ , n  
585 =6).

586

587

588

589

590

591

592

593

594

595

596

597

598

599

600

601

602

603

604

605

606

607

608

609

610  
611  
612  
613  
614  
615  
616  
617  
618

**Table 2.** The effect of *L. reuteri* in BALB/c mice at taxonomy level

| Taxon                             | female                 |                        |                        | male                    |                         |                         |
|-----------------------------------|------------------------|------------------------|------------------------|-------------------------|-------------------------|-------------------------|
|                                   | control                | low-dose               | high-dose              | control                 | low-dose                | high-dose               |
| <b>Bacteroidetes</b>              | 39.773±6.89            | 53.90±8.08             | 46.27±9.08             | 59.17±6.05              | 48.62±6.85              | 47.06±10.12             |
| <i>Barnesiella</i>                | 15.02±3.10             | 30.47±8.44             | 22.68±7.03             | 28.38±4.04              | 25.08±4.64              | 24.17±7.75              |
| <i>Acetobacteroides</i>           | 0.56±0.13              | 0.52±0.17              | 0.87±0.25              | 0.98±0.10 <sup>ab</sup> | 1.32±0.25 <sup>a</sup>  | 0.43±0.20 <sup>b</sup>  |
| <i>Parabacteroides</i>            | 0.42±0.16              | 0.47±0.13              | 0.44±0.08              | 1.09±0.24               | 0.67±0.11               | 0.59±0.18               |
| <i>Alistipes</i>                  | 11.35±1.92             | 9.37±3.57              | 10.36±0.90             | 8.33±1.66               | 6.28±0.95               | 9.48±1.59               |
| <i>Bacteroides</i>                | 3.56±1.01              | 5.40±1.29              | 4.05±0.67              | 7.81±1.78 <sup>a</sup>  | 3.09±0.19 <sup>b</sup>  | 4.38±1.07 <sup>ab</sup> |
| <i>Prevotella</i>                 | 0.38±0.15              | 0.87±0.46              | 0.54±0.35              | 0.96±0.14 <sup>a</sup>  | 0.58±0.05 <sup>b</sup>  | 0.25±0.02 <sup>c</sup>  |
| <b>Firmicutes</b>                 | 54.33±6.08             | 38.36±4.82             | 49.63±9.18             | 33.63±4.89              | 46.90±6.05              | 48.16±10.52             |
| <i>ClostridiumXIVa</i>            | 12.20±3.86             | 5.50±2.23              | 5.47±1.80              | 4.26±1.0                | 6.40±1.75               | 6.68±1.30               |
| <i>ClostridiumXIVb</i>            | 0.12±0.02              | 0.25±0.08              | 0.35±0.11              | 0.23±0.09               | 0.28±0.06               | 0.30±0.12               |
| <i>ClostridiumIV</i>              | 3.08±0.45              | 1.53±0.43              | 2.03±0.74              | 1.1±0.24 <sup>b</sup>   | 1.42±0.27 <sup>ab</sup> | 1.91±0.12 <sup>a</sup>  |
| <i>Bacillus</i>                   | 0.04±0.02              | 0.03±0.00              | 0.01±0.00              | 0.03±0.01               | 0.01±0.00               | 0.01±0.00               |
| <i>Lactobacillus</i>              | 1.13±0.57              | 2.91±0.95              | 2.77±0.94              | 0.89±0.12               | 0.52±0.09               | 1.77±0.77               |
| <i>Lactococcus</i>                | 0.06±0.05              | 0.05±0.01              | 0.17±0.17              | 0.12±0.06               | 0.07±0.03               | 0.03±0.01               |
| <i>Enterococcus</i>               | 0.00±0.00              | 0.00±0.00              | 0.00±0.00              | 0.01±0.01               | 0.00±0.00               | 0.01±0.00               |
| <b>Proteobacteria</b>             | 4.98±1.51              | 7.15±4.13              | 3.76±1.34              | 6.54±2.84               | 3.91±1.32               | 4.50±1.86               |
| <i>Escherichia/Shigella</i>       | 0.01±0.00              | 0.04±0.01              | 0.02±0.01              | 0.05±0.03               | 0.05±0.02               | 0.00±0.00               |
| <i>Helicobacter</i>               | 0.90±0.17 <sup>b</sup> | 2.63±0.56 <sup>a</sup> | 1.14±0.27 <sup>b</sup> | 2.55±1.25               | 2.37±1.10               | 1.46±0.62               |
| <b>Actinobacteria</b>             | 0.47±0.13 <sup>a</sup> | 0.45±0.06 <sup>a</sup> | 0.17±0.03 <sup>b</sup> | 0.36±0.12               | 0.26±0.07               | 0.16±0.06               |
| <i>Bifidobacteriaceae</i>         | 0.01±0.0               | 0.02±0.01              | 0.00±0.00              | 0.00±0.00               | 0.02±0.00               | 0.00±0.00               |
| <b>CandidatusSaccharibacteria</b> | 0.45±0.17              | 0.15±0.08              | 0.15±0.10              | 0.22±0.07               | 0.20±0.10               | 0.09±0.08               |
| <b>Tenericutes</b>                | 0.00±0.00              | 0.00±0.00              | 0.00±0.00              | 0.05±0.04               | 0.00±0.00               | 0.00±0.00               |

619 B) Values in a line with different superscript letters mean the index differ significantly (P < 0.05, n =4).

620 Data were expressed as mean ± standard error.

621  
622  
623

624

625

626

627

628 **Figure captions**

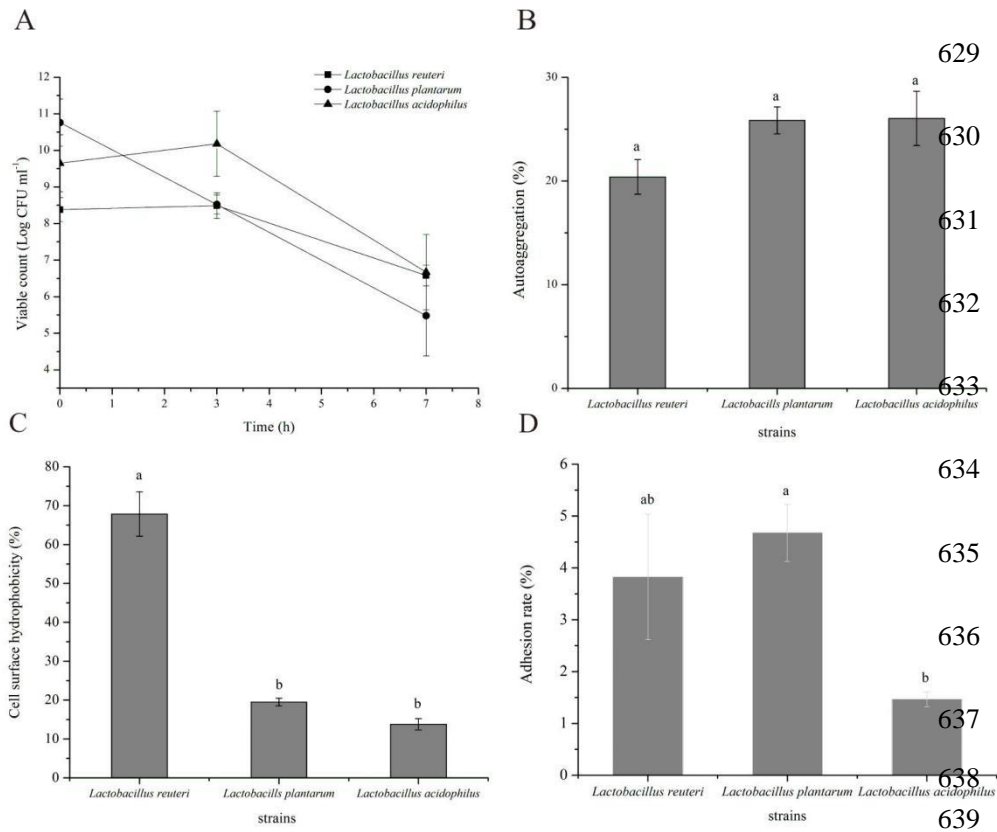

640 **Fig 1.** Screening experiment of probiotic *Lactobacillus*. (A) Survivability of *Lactobacillus* strains after  
641 low pH (pH=2.0) and bile salt (0.5%) treatment; (B) Auto-aggregation analysis. “a” means the index  
642 did not differ significantly ( $P>0.05$ ,  $n=4$ ); (C) Cell surface hydrophobicity analysis. “a” and “b” mean  
643 the indices differed significantly ( $P>0.05$ ,  $n=4$ ); (D) Adhesion to Caco-2 cell line. “a” and “b” mean the  
644 indices differed significantly ( $P>0.05$ ,  $n=3$ ). All data are presented as mean  $\pm$  SE.

645

646

647

648

649

650

651

652

653

654

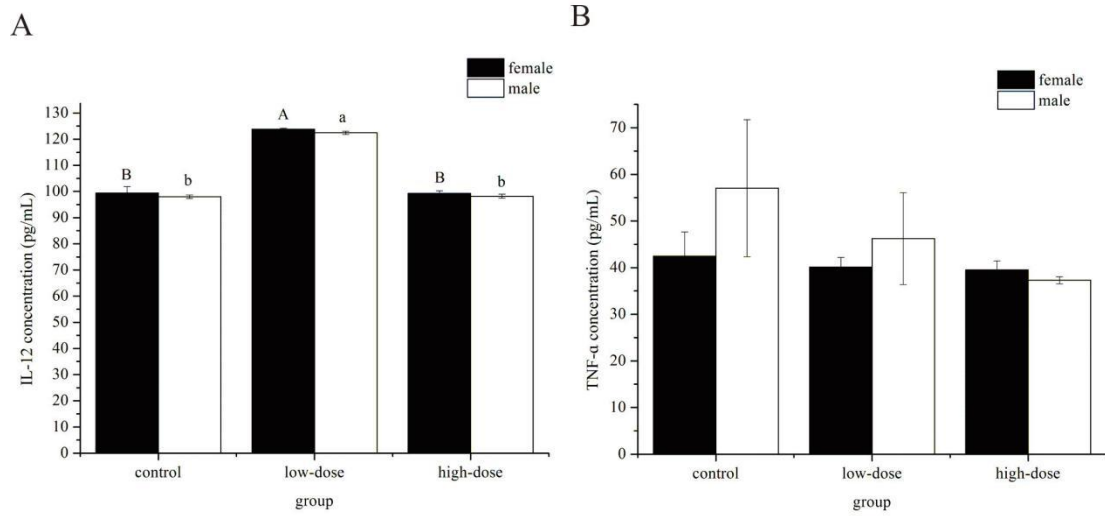

655 **Fig 2.** IL-12/TNF- $\alpha$  concentration induced by *L. reuteri* DMSZ 8533. IL-12 concentration induced by *L.*  
656 *reuteri*. Letters in a column mean the indices differed significantly (P<0.05); (B) TNF- $\alpha$  concentration  
657 induced by *L. reuteri*. Data are presented as mean  $\pm$  SE, n =4.

658

659

660

661

662

663

664

665

666

667

668

669

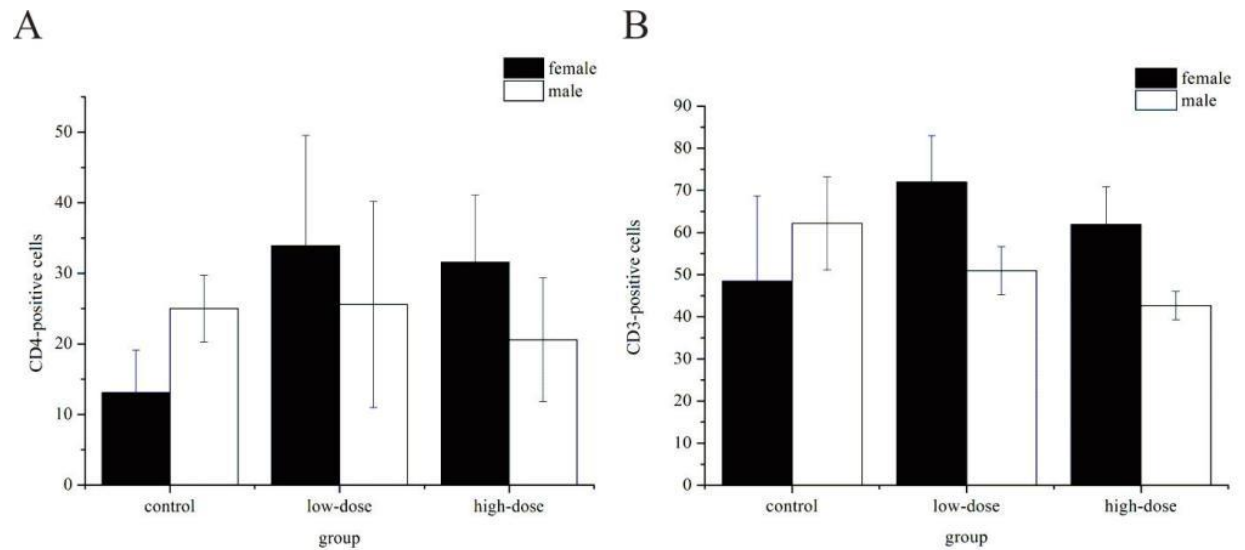

670

671 **Fig 3.** Effect of *L. reuteri* DMSZ 8533 on CD4- and CD3-positive cells in the ileum of BALB/C mice.

672 (A) CD4-positive cells induced by different doses of *L. reuteri*; (B) CD3-positive cells induced by

673 different doses of *L. reuteri*. Data are presented as mean  $\pm$  SE, n=4.

674

675

676

677

678

679

680

681

682

683

684

685

686

687

688

689

690

691

692

693

694

695

696

697

698

699



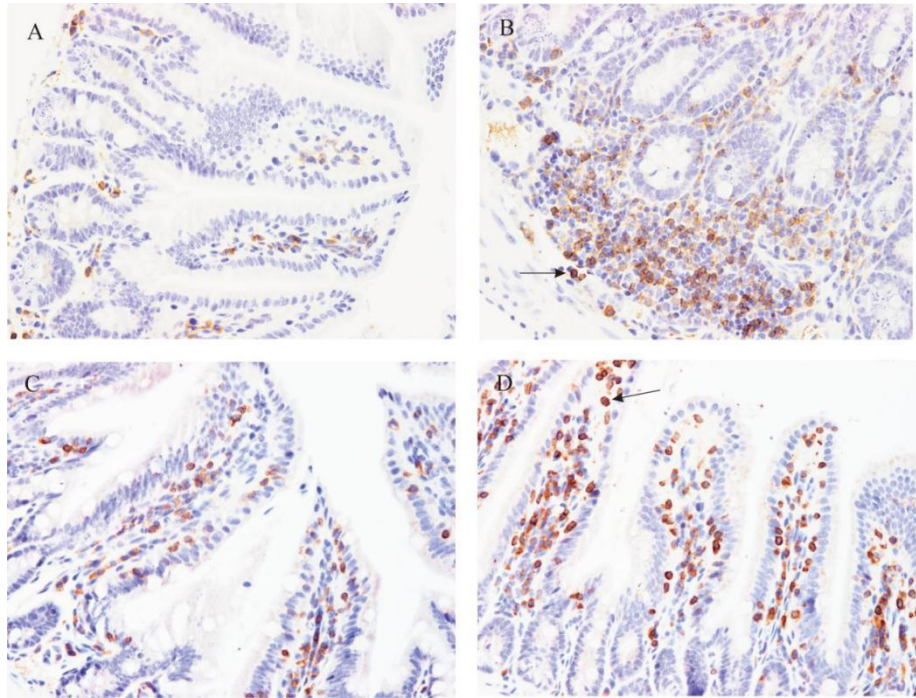

700

701 **Fig 4.** CD4- and CD3-positive cells in female ileal mucosa before and after administration of low doses  
702 of *L. reuteri*. (A) and (B), control and low-dose groups for CD4-positive cells; (C) and (D), control and  
703 low-dose groups for CD3-positive cells. The arrows in Fig. 4B and Fig. 4D pointed to CD4-positive  
704 cells and CD3-positive cells respectively.

705

706

707

708

709

710

711

712

713

714

715

716

717

718

719

720

721

722

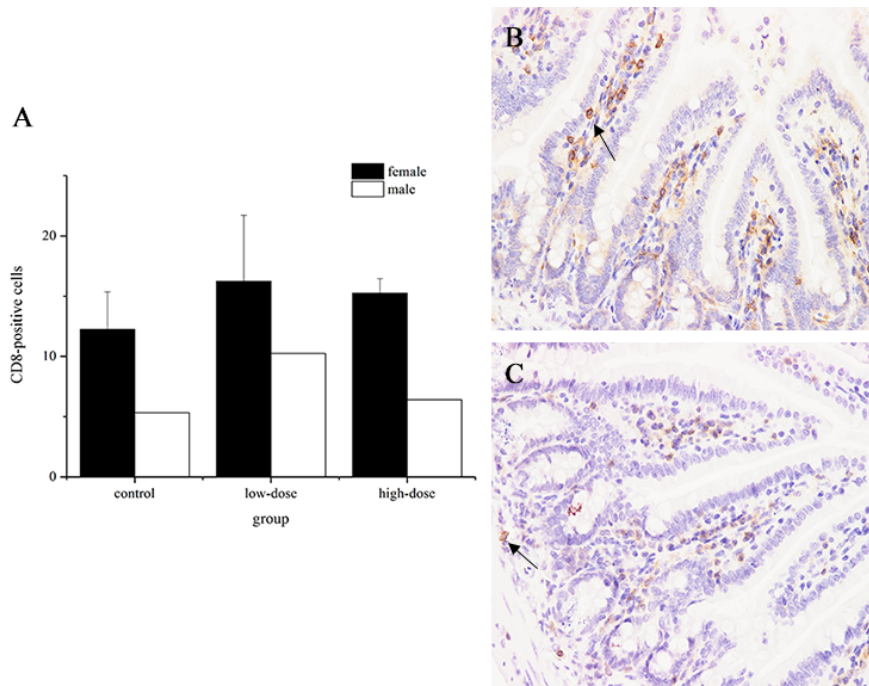

723

724 **Fig 5.** Effect of *L. reuteri* DMSZ 8533 on CD8-positive cells in the ileum of BALB/C mice. (A)

725 CD8-positive cells induced by different doses of *L. reuteri*; (B) CD8-positive cells in female ileal

726 mucosa induced by high doses of *L. reuteri*. (C) CD8-positive cells in male ileal mucosa induced by

727 high doses of *L. reuteri*. Data are presented as mean  $\pm$  SE, n=4.

728

729

730

731

732

733

734

735

736

737

738

739

740

741

742

743

744

745

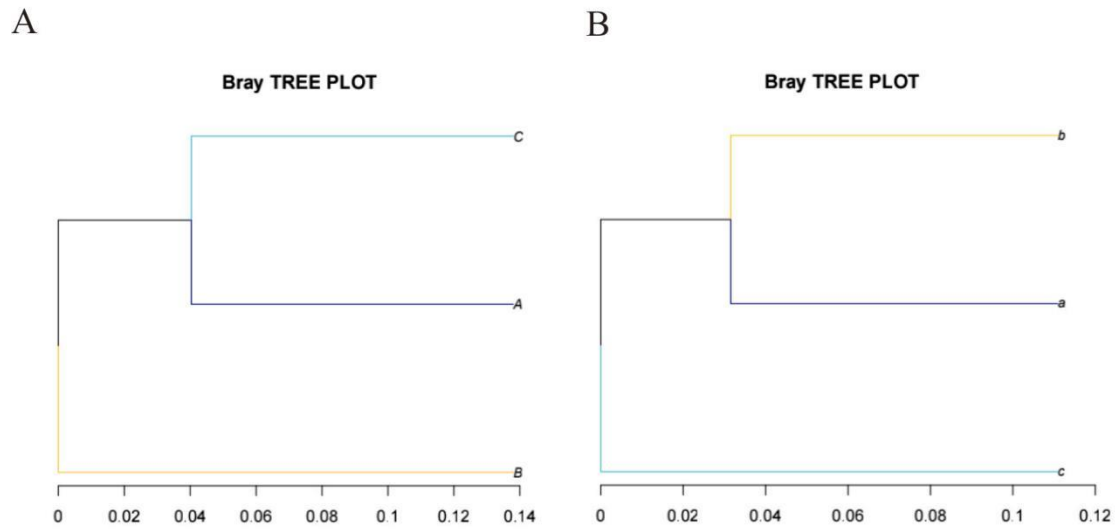

746

747 **Fig 6.** Dose-dependent effect of *L. reuteri* DMSZ 8533 on microflora structure. (A) and (B) Clustering

748 analysis of bacterial community in female and male mice. “a” and “A” refer to control group, “b” and

749 “B” refer to low-dose group, “c” and “C” refer to high-dose group.

750

751

752

753

754

755

756

757

758

759

760

761

762

763
